# Supplementary material
Source: HighWire-hosted journal article supplement (https://bmjopen.bmj.com/content/11/4/e045433)
Supplement: inline-supplementary-material-1 [file inline-supplementary-material-1.pdf]

**Association between parental socioeconomic status and offspring overweight/obesity from The China Family Panel Studies:  
a longitudinal survey**

Suqin Ding<sup>1,2</sup>, Jingqi Chen<sup>1</sup>, Bin Dong<sup>1</sup>, Jie Hu<sup>3</sup>

1. Institute of Child and Adolescent Health, School of Public Health, Peking University, Beijing, China
2. Department of Chronic Disease Control and Prevention, Suzhou Industrial Park Center for Disease Control and Prevention, Suzhou, China
3. Menzies Health Institute Queensland, Griffith University, Brisbane, Queensland, Australia

Correspondence to

Dr Jingqi Chen;

[g3jing\\_qi@bjmu.edu.cn](mailto:g3jing_qi@bjmu.edu.cn) and

Dr Bin Dong;

[bindong@bjmu.edu.cn](mailto:bindong@bjmu.edu.cn)

Table S1 P<sub>95</sub> of Predicted BMI from 0-15 years by category of average household income (Kg/m<sup>2</sup>)

| Age (years) | Boys        |           |            |            |             | Girls       |           |            |            |             |
|-------------|-------------|-----------|------------|------------|-------------|-------------|-----------|------------|------------|-------------|
|             | The poorest | Lower 20% | Medium 20% | Higher 20% | The richest | The poorest | Lower 20% | Medium 20% | Higher 20% | The richest |
| 0           | 18.06       | 17.90     | 17.83      | 18.07      | 17.83       | 17.87       | 17.79     | 17.70      | 17.69      | 17.68       |
| 1           | 17.74       | 17.58     | 17.52      | 17.75      | 17.51       | 17.62       | 17.55     | 17.46      | 17.45      | 17.44       |
| 2           | 17.43       | 17.28     | 17.21      | 17.44      | 17.20       | 17.37       | 17.31     | 17.22      | 17.21      | 17.20       |
| 3           | 17.16       | 17.00     | 16.93      | 17.17      | 16.93       | 17.15       | 17.08     | 17.00      | 16.99      | 16.98       |
| 4           | 16.96       | 16.81     | 16.74      | 16.97      | 16.73       | 16.97       | 16.90     | 16.81      | 16.80      | 16.79       |
| 5           | 16.88       | 16.72     | 16.65      | 16.89      | 16.65       | 16.85       | 16.77     | 16.69      | 16.68      | 16.66       |
| 6           | 16.95       | 16.76     | 16.72      | 16.96      | 16.72       | 16.79       | 16.72     | 16.63      | 16.62      | 16.61       |
| 7           | 17.18       | 17.03     | 16.96      | 17.19      | 16.95       | 16.83       | 16.76     | 16.67      | 16.66      | 16.65       |
| 8           | 17.54       | 17.38     | 17.31      | 17.55      | 17.30       | 16.95       | 16.88     | 16.79      | 16.78      | 16.77       |
| 9           | 17.94       | 17.78     | 17.71      | 17.95      | 17.70       | 17.15       | 17.08     | 16.99      | 16.98      | 16.97       |
| 10          | 18.31       | 18.15     | 18.08      | 18.32      | 18.08       | 17.42       | 17.35     | 17.26      | 17.25      | 17.24       |
| 11          | 18.61       | 18.45     | 18.37      | 18.62      | 18.37       | 17.75       | 17.68     | 17.59      | 17.58      | 17.57       |
| 12          | 18.77       | 18.67     | 18.60      | 18.84      | 18.60       | 18.13       | 18.05     | 17.97      | 17.96      | 17.95       |
| 13          | 19.00       | 18.85     | 18.78      | 19.01      | 18.77       | 18.54       | 18.46     | 18.38      | 18.37      | 18.36       |
| 14          | 19.10       | 18.94     | 18.87      | 19.11      | 18.86       | 18.96       | 18.89     | 18.80      | 18.79      | 18.78       |
| 15          | 19.24       | 19.09     | 19.02      | 19.25      | 19.01       | 19.41       | 19.33     | 19.25      | 19.24      | 19.23       |

Table S2 P<sub>95</sub> of Predicted BMI from 0-15 years by category of paternal education level (Kg/m<sup>2</sup>)

| Age (years) | Boys                   |                    |                    |                          |            | Girls                  |                    |                    |                          |            |
|-------------|------------------------|--------------------|--------------------|--------------------------|------------|------------------------|--------------------|--------------------|--------------------------|------------|
|             | Primary school or less | Junior high school | Senior high school | Junior college or higher | Difference | Primary school or less | Junior high school | Senior high school | Junior college or higher | Difference |
| 0           | 17.91                  | 17.89              | 17.88              | 17.86                    | 0.05       | 17.71                  | 17.69              | 17.67              | 17.64                    | 0.07       |
| 1           | 17.67                  | 17.58              | 17.49              | 17.35                    | 0.32       | 17.55                  | 17.45              | 17.34              | 17.24                    | 0.31       |
| 2           | 17.44                  | 17.28              | 17.11              | 16.87                    | 0.57       | 17.39                  | 17.21              | 17.02              | 16.84                    | 0.55       |
| 3           | 17.24                  | 17.01              | 16.77              | 16.49                    | 0.75       | 17.25                  | 16.99              | 16.73              | 16.47                    | 0.78       |
| 4           | 17.10                  | 16.81              | 16.52              | 16.16                    | 0.94       | 17.12                  | 16.80              | 16.48              | 16.16                    | 0.96       |
| 5           | 17.05                  | 16.72              | 16.40              | 16.05                    | 1          | 17.04                  | 16.67              | 16.30              | 15.94                    | 1.1        |
| 6           | 17.12                  | 16.78              | 16.44              | 16.01                    | 1.11       | 17.01                  | 16.61              | 16.22              | 15.83                    | 1.18       |
| 7           | 17.34                  | 17.01              | 16.69              | 16.25                    | 1.09       | 17.03                  | 16.64              | 16.25              | 15.87                    | 1.16       |
| 8           | 17.64                  | 17.35              | 17.07              | 16.77                    | 0.87       | 17.11                  | 16.75              | 16.40              | 16.04                    | 1.07       |
| 9           | 17.97                  | 17.75              | 17.53              | 17.26                    | 0.71       | 17.25                  | 16.95              | 16.64              | 16.33                    | 0.92       |
| 10          | 18.26                  | 18.12              | 17.98              | 17.80                    | 0.46       | 17.44                  | 17.21              | 16.97              | 16.74                    | 0.7        |
| 11          | 18.49                  | 18.42              | 18.35              | 18.32                    | 0.17       | 17.69                  | 17.54              | 17.39              | 17.25                    | 0.44       |
| 12          | 18.60                  | 18.65              | 18.70              | 18.70                    | -0.1       | 17.97                  | 17.92              | 17.88              | 17.83                    | 0.14       |
| 13          | 18.69                  | 18.84              | 19.00              | 19.13                    | -0.44      | 18.28                  | 18.35              | 18.41              | 18.48                    | -0.2       |
| 14          | 18.70                  | 18.96              | 19.23              | 19.49                    | -0.79      | 18.62                  | 18.80              | 18.98              | 19.16                    | -0.54      |
| 15          | 18.76                  | 19.13              | 19.50              | 19.87                    | -1.11      | 18.96                  | 19.26              | 19.57              | 19.87                    | -0.91      |

Difference indicates the P<sub>95</sub> BMI difference between the lowest education level and highest education level.

Table S3 P<sub>95</sub> of Predicted BMI from 0-15 years by category of maternal education level (Kg/m<sup>2</sup>)

| Age (years) | Boys                   |                    |                    |                          |            | Girls                  |                    |                    |                          |            |
|-------------|------------------------|--------------------|--------------------|--------------------------|------------|------------------------|--------------------|--------------------|--------------------------|------------|
|             | Primary school or less | Junior high school | Senior high school | Junior college or higher | Difference | Primary school or less | Junior high school | Senior high school | Junior college or higher | Difference |
| 0           | 17.77                  | 17.88              | 17.99              | 18.09                    | -0.32      | 17.69                  | 17.70              | 17.70              | 17.69                    | 0          |
| 1           | 17.56                  | 17.56              | 17.55              | 17.50                    | 0.06       | 17.58                  | 17.43              | 17.29              | 17.14                    | 0.44       |
| 2           | 17.36                  | 17.24              | 17.13              | 16.96                    | 0.4        | 17.49                  | 17.19              | 16.89              | 16.58                    | 0.91       |
| 3           | 17.19                  | 16.97              | 16.70              | 16.48                    | 0.71       | 17.38                  | 16.95              | 16.52              | 16.08                    | 1.3        |
| 4           | 17.07                  | 16.76              | 16.42              | 16.06                    | 1.01       | 17.29                  | 16.75              | 16.21              | 15.67                    | 1.62       |
| 5           | 17.04                  | 16.67              | 16.31              | 15.86                    | 1.18       | 17.21                  | 16.61              | 16.00              | 15.40                    | 1.81       |
| 6           | 17.11                  | 16.73              | 16.35              | 15.85                    | 1.26       | 17.15                  | 16.54              | 15.94              | 15.31                    | 1.84       |
| 7           | 17.32                  | 16.96              | 16.54              | 16.11                    | 1.21       | 17.12                  | 16.58              | 16.03              | 15.49                    | 1.63       |
| 8           | 17.61                  | 17.30              | 16.95              | 16.66                    | 0.95       | 17.13                  | 16.70              | 16.25              | 15.81                    | 1.32       |
| 9           | 17.92                  | 17.70              | 17.44              | 17.24                    | 0.68       | 17.20                  | 16.90              | 16.61              | 16.17                    | 1.03       |
| 10          | 18.20                  | 18.09              | 17.98              | 17.83                    | 0.37       | 17.34                  | 17.19              | 17.03              | 16.85                    | 0.49       |
| 11          | 18.41                  | 18.42              | 18.37              | 18.35                    | 0.06       | 17.57                  | 17.53              | 17.48              | 17.26                    | 0.31       |
| 12          | 18.55                  | 18.69              | 18.79              | 18.90                    | -0.35      | 17.88                  | 17.94              | 18.00              | 18.01                    | -0.13      |
| 13          | 18.65                  | 18.92              | 19.20              | 19.36                    | -0.71      | 18.23                  | 18.38              | 18.52              | 18.67                    | -0.44      |
| 14          | 18.68                  | 19.09              | 19.51              | 19.87                    | -1.19      | 18.63                  | 18.85              | 19.07              | 19.28                    | -0.65      |
| 15          | 18.75                  | 19.30              | 19.85              | 20.32                    | -1.57      | 19.04                  | 19.33              | 19.62              | 19.90                    | -0.86      |

Difference indicates the P<sub>95</sub> BMI difference between the lowest education level and highest education level.

Table S4 Association between paternal education level and offspring overweight/obesity (OR, 95%CI)

|                                     | <b>Model 1</b><br>(N=4520,<br>observation=10588) | <b>Model 2</b><br>(N=1826,<br>observation=2954) | <b>Model 3</b><br>(N=2400,<br>observation=4087) | <b>Model 4</b><br>(N=1826,<br>observation=2954) |
|-------------------------------------|--------------------------------------------------|-------------------------------------------------|-------------------------------------------------|-------------------------------------------------|
| <b>Paternal education level</b>     |                                                  |                                                 |                                                 |                                                 |
| Primary school or less              | Ref                                              | Ref                                             | Ref                                             | Ref                                             |
| Junior high school                  | 0.79(0.67-0.94)                                  | 1.09(0.55-2.16)                                 | 0.82(0.45-1.47)                                 | 1.14(0.56-2.29)                                 |
| Senior high school                  | 0.65(0.51-0.82)                                  | 1.43(0.57-3.62)                                 | 0.70(0.31-1.62)                                 | 1.52(0.59-3.93)                                 |
| Junior college or higher            | 0.55(0.41-0.74)                                  | 1.75(0.54-5.66)                                 | 0.95(0.34-2.66)                                 | 1.97(0.59-6.58)                                 |
| <b>Residence</b>                    | 1.28(1.09-1.51)                                  | 1.19(0.61-2.34)                                 | 0.84(0.47-1.51)                                 | 1.18(0.59-2.35)                                 |
| <b>Sex</b>                          | 0.56(0.48-0.65)                                  | 0.08(0.03-0.19)                                 | 0.11(0.05-0.22)                                 | 0.07(0.03-0.18)                                 |
| <b>Child age</b>                    | 0.82(0.80-0.83)                                  | 0.56(0.46-0.69)                                 | 0.56(0.47-0.66)                                 | 0.57(0.46-0.70)                                 |
| <b>Average household income</b>     | 0.97(0.92-1.02)                                  | 0.90(0.73-1.11)                                 | 0.97(0.81-1.16)                                 | 0.91(0.74-1.12)                                 |
| <b>Birth weight</b>                 | 1.27(1.06-1.53)                                  | 2.13(1.05-4.30)                                 | 2.01(1.08-3.74)                                 | 2.20(1.07-4.51)                                 |
| <b>Paternal obesity</b>             | 1.66(1.34-2.06)                                  | 2.88(1.21-6.84)                                 | 3.06(1.49-6.31)                                 | 3.16(1.30-7.69)                                 |
| <b>Maternal obesity</b>             | 1.63(1.23-2.16)                                  | 2.12(0.72-6.25)                                 | 1.73(0.73-4.10)                                 | 2.31(0.76-6.97)                                 |
| <b>Consumption of meat</b>          |                                                  | 0.97(0.41-2.27)                                 |                                                 | 0.92(0.39-2.20)                                 |
| <b>Consumption of vegetable and</b> |                                                  | 0.16(0.05-0.53)                                 |                                                 | 0.19(0.06-0.63)                                 |
| <b>Consumption of fried food</b>    |                                                  | 0.59(0.35-1.00)                                 |                                                 | 0.61(0.36-1.03)                                 |
| <b>Exercise</b>                     |                                                  |                                                 | 0.57(0.36-0.91)                                 | 0.46(0.25-0.82)                                 |
| <b>Constant</b>                     | 0.61(0.35-1.08)                                  | 135.67(4.97-3701.48)                            | 39.41(3.27-474.43)                              | 158.72(5.36-4699.56)                            |

Table S5 Association between maternal education level and offspring overweight/obesity (OR, 95%CI)

|                                           | <b>Model 1</b><br>(N=4520,<br>observation=10588) | <b>Model 2</b><br>(N=1826,<br>observation=2954) | <b>Model 3</b><br>(N=2400,<br>observation=4087) | <b>Model 4</b><br>(N=1826,<br>observation=2954) |
|-------------------------------------------|--------------------------------------------------|-------------------------------------------------|-------------------------------------------------|-------------------------------------------------|
| <b>Maternal education level</b>           |                                                  |                                                 |                                                 |                                                 |
| Primary school or less                    | Ref                                              | Ref                                             | Ref                                             | Ref                                             |
| Junior high school                        | 0.74(0.63-0.87)                                  | 1.20(0.61-2.36)                                 | 1.09(0.61-1.92)                                 | 1.31(0.65-2.63)                                 |
| Senior high school                        | 0.55(0.42-0.71)                                  | 2.53(0.91-7.00)                                 | 0.97(0.39-2.39)                                 | 2.69(0.94-7.73)                                 |
| Junior college or higher                  | 0.42(0.31-0.58)                                  | 2.17(0.61-7.71)                                 | 0.90(0.30-2.73)                                 | 2.52(0.67-9.44)                                 |
| <b>Residence</b>                          | 1.17(0.99-1.39)                                  | 1.38(0.69-2.76)                                 | 0.88(0.49-1.59)                                 | 1.38(0.67-2.82)                                 |
| <b>Sex</b>                                | 0.56(0.49-0.65)                                  | 0.08(0.03-0.18)                                 | 0.11(0.05-0.22)                                 | 0.07(0.03-0.17)                                 |
| <b>Child age</b>                          | 0.81(0.80-0.83)                                  | 0.57(0.46-0.69)                                 | 0.56(0.48-0.66)                                 | 0.57(0.46-0.70)                                 |
| <b>Average household income</b>           | 0.98(0.93-1.03)                                  | 0.89(0.72-1.09)                                 | 0.97(0.82-1.16)                                 | 0.90(0.72-1.11)                                 |
| <b>Birth weight</b>                       | 1.26(1.05-1.52)                                  | 2.17(1.08-4.38)                                 | 2.01(1.08-3.74)                                 | 2.27(1.10-4.71)                                 |
| <b>Paternal obesity</b>                   | 1.69(1.36-2.10)                                  | 2.74(1.16-6.48)                                 | 2.99(1.46-6.16)                                 | 2.99(1.22-7.29)                                 |
| <b>Maternal obesity</b>                   | 1.62(1.22-2.15)                                  | 2.11(0.72-6.20)                                 | 1.70(0.72-4.03)                                 | 2.32(0.76-7.05)                                 |
| <b>Consumption of meat</b>                |                                                  | 0.96(0.41-2.25)                                 |                                                 | 0.91(0.38-2.19)                                 |
| <b>Consumption of vegetable and fruit</b> |                                                  | 0.16(0.05-0.50)                                 |                                                 | 0.18(0.05-0.60)                                 |
| <b>Consumption of fried food</b>          |                                                  | 0.57(0.34-0.96)                                 |                                                 | 0.58(0.34-1.00)                                 |
| <b>Exercise</b>                           |                                                  |                                                 | 0.57(0.36-0.91)                                 | 0.45(0.25-0.81)                                 |
| <b>Constant</b>                           | 0.72(0.41-1.26)                                  | 110.16(4.23-2870.20)                            | 30.27(2.62-350.12)                              | 131.86(4.56-3811.72)                            |
